# Supplementary material for: Bone resorption facilitates osteoblastic bone metastatic colonization by cooperation of insulin-like growth factor and hypoxia
Source: PubMed Central journal article supplement — Cancer Sci. 2014 Apr 3;105(5):553–9. doi: 10.1111/cas.12391 (PMC4317828; doi:10.1111/cas.12391), 2014-04-03
Supplement: cas0105-0553-sd1.pdf [file cas0105-0553-sd1.pdf]

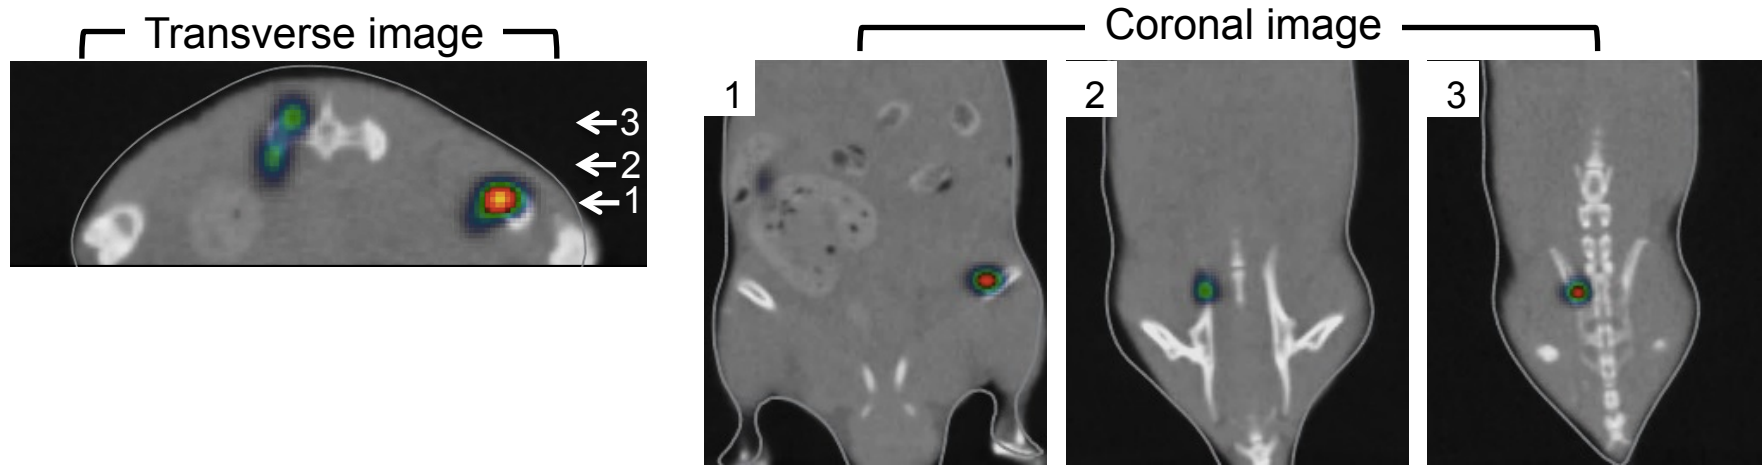

**Supplementary Figure 1.** Coronal images of the entire body image shown in Figure 1d. Coronal images are cross sections indicated by corresponding arrows 1 - 3 in the transverse image.

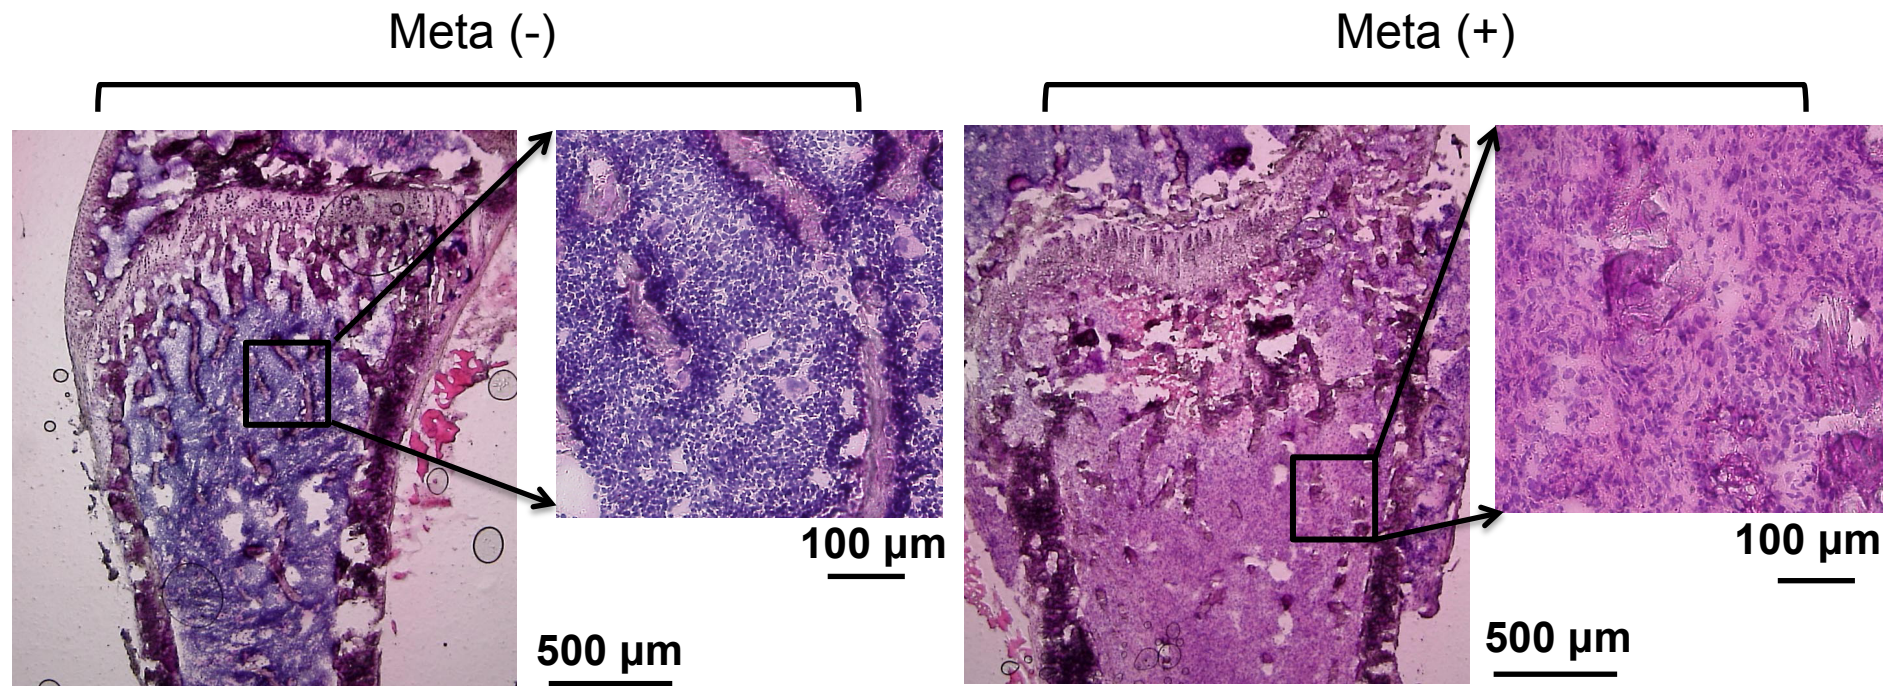

**Supplementary Figure 2.** Histology analysis of LM8 osteoblastic bone metastasis. HE staining was performed using metastasis free (Meta-) and bone metastatic (Meta+) serial cross sections shown in Fig.1 (e).

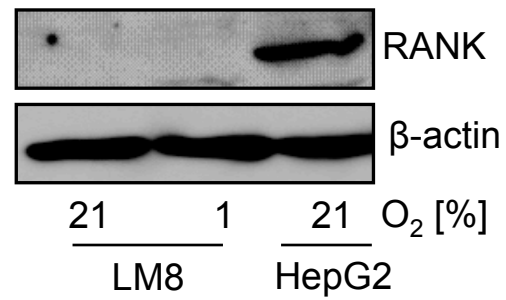

**Supplementary Figure 3.** Protein level of RANK in LM8. Human liver cancer HepG2 cultured under 21%  $O_2$  was used as a control.

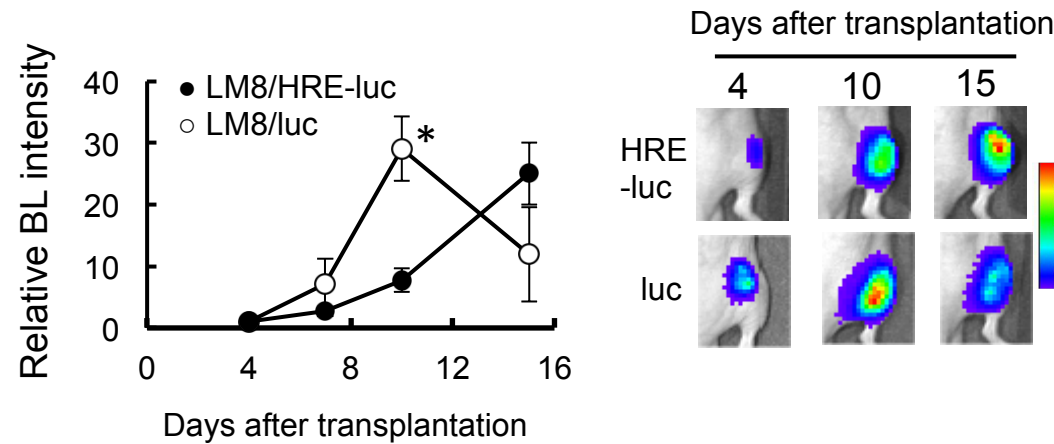

**Supplementary Figure 4.** Quantitative analysis of HIF activity in subcutaneous tumors. Relative luciferase activity in subcutaneous tumors of LM8/HRE-luc or LM8/luc was measured at indicated time after transplantation. Representative images of LM8/HRE-luc and LM8/luc were shown.  $n = 8$  for LM8/HRE-luc,  $n = 5$  for LM8/luc,  $*p < 0.01$ .

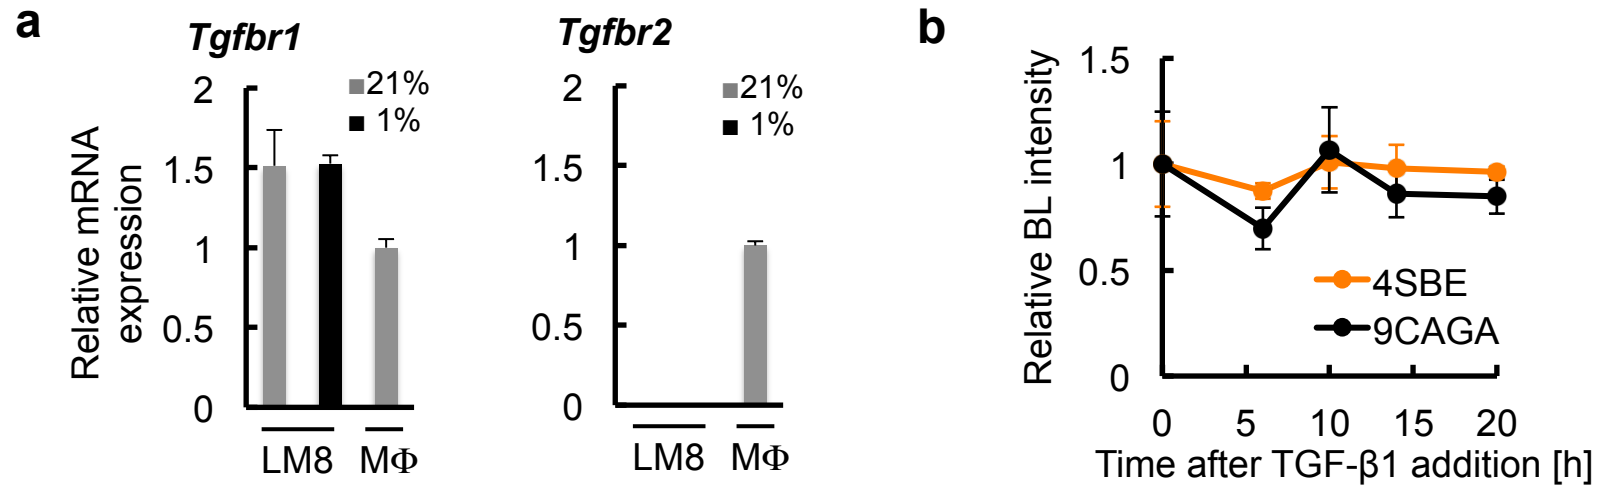

**Supplementary Figure 5.** Analysis of TGF- $\beta$ /Smad signaling in LM8. **(a)** Relative mRNA levels of *Tgfb1* and *Tgfb2* in LM8 cultured under 21% and 1% O<sub>2</sub>. Mouse primary macrophage (MΦ) cultured under 21% O<sub>2</sub> was used as a control. **(b)** Response of TGF- $\beta$ /Smad pathway in LM8 treated with TGF- $\beta$  (10 ng/mL). TGF- $\beta$ /Smad pathway activation was assessed by using indicated TGF- $\beta$  responsive luciferase reporters.
